# Supplementary material for: Novel drug isolated from mistletoe (1E,4E)-1,7-bis(4-hydroxyphenyl)hepta-1,4-dien-3-one for potential treatment of various cancers: synthesis, pharmacokinetics and pharmacodynamics
Source: PubMed Central journal article supplement — RSC Adv. 2020 Jul 24;10(46):27794–804. doi: 10.1039/d0ra03674a (PMC9055608; doi:10.1039/d0ra03674a), 2020-07-24
Supplement: RA-010-D0RA03674A-s001.pdf [file RA-010-D0RA03674A-s001.pdf]

*Supplementary material for*

**A novel drug(1E,4E)-1,7-bis(4-hydroxyphenyl) hepta-1,4-dien-3-one for varieties of cancer treatment: synthesis, pharmacokinetics, pharmacodynamics study**

Jing Hong <sup>a</sup>, Lin Meng <sup>a</sup>, Peipei Yu <sup>a</sup>, Ceng Zhou <sup>a</sup>, Zhaoyan Zhang <sup>a</sup>, Zhiguo Yu <sup>a</sup>, Yunli Zhao \*

Feng Qin \*

*School of Pharmacy, Shenyang Pharmaceutical University, Shenyang 110016, China*

\* Corresponding author at: School of Pharmacy, Shenyang Pharmaceutical University, Shenyang 110016, China

Tel.: +86 024 43520580; fax: +86 24 43520580. E-mail addresses: [Yunli76@163.com](mailto:Yunli76@163.com)

Tel.: +86 024 43520571; E-mail addresses: [qf-1998@163.com](mailto:qf-1998@163.com)

## SUPPLEMENT DATA AVAILABLE

**Fig. S1**  $^1\text{H-NMR}$  spectra of 4-(methoxymethoxy)-benzene propanoic acid methyl ester.

**Fig. S2**  $^1\text{H-NMR}$  spectra of 4-(methoxymethoxy)-benzene propanol.

**Fig. S3**  $^1\text{H-NMR}$  spectra of (1E,4E)-1,7-bis(4-hydroxyphenyl) hepta-1,4-dien-3-one.

**Fig. S4**  $^{13}\text{C-NMR}$  spectra of (1E,4E)-1,7-bis(4-hydroxyphenyl) hepta-1,4-dien-3-one.

**Fig. S5** MS spectra of (1E,4E)-1,7-bis(4-hydroxyphenyl) hepta-1,4-dien-3-one.

**Fig. S6** Tissue slice of liver histopathology of various group obtained after the mice were sacrificed(A: Negative control group, B: Low-dose group, C: Medium-dose group, D: High-dose group, E: Positive control group).

**Fig. S7** Tissue slice of spleen histopathology of various group obtained after the mice were sacrificed(A: Negative control group, B: Low-dose group, C: Medium-dose group, D: High-dose group, E: Positive control group).

**Fig. S8** Tissue slice of lung histopathology of various group obtained after the mice were sacrificed(A: Negative control group, B: Low-dose group, C: Medium-dose group, D: High-dose group, E: Positive control group).

**Fig. S9** Tissue slice of kidney histopathology of various group obtained after the mice were sacrificed(A: Negative control group, B: Low-dose group, C: Medium-dose group, D: High-dose group, E: Positive control group).

**Fig. S10** Tissue slice of brain histopathology of various group obtained after the mice were sacrificed(A: Negative control group, B: Low-dose group, C: Medium-dose group, D: High-dose group, E: Positive control group).

**Table S1.** Mean Tumor volume of various group at indicated time points after tail vein injection of DHDK solution

**Table S2.** Mean mouse weight of various group at indicated time points after tail vein injection of DHDK solution

**Table S3.** Plasma concentration of DHDK ( $\text{ng}\cdot\text{mL}^{-1}$ ) after tail vein injection of  $14\text{ mg}\cdot\text{kg}^{-1}$  DHDK solution ( $n=6$ )

**Table S4.** Concentrations of DHDK ( $\text{ng}\cdot\text{mL}^{-1}$ ) in rat tissues after tail vein injection of  $14\text{ mg}\cdot\text{kg}^{-1}$  DHDK solution ( $n=6$ )

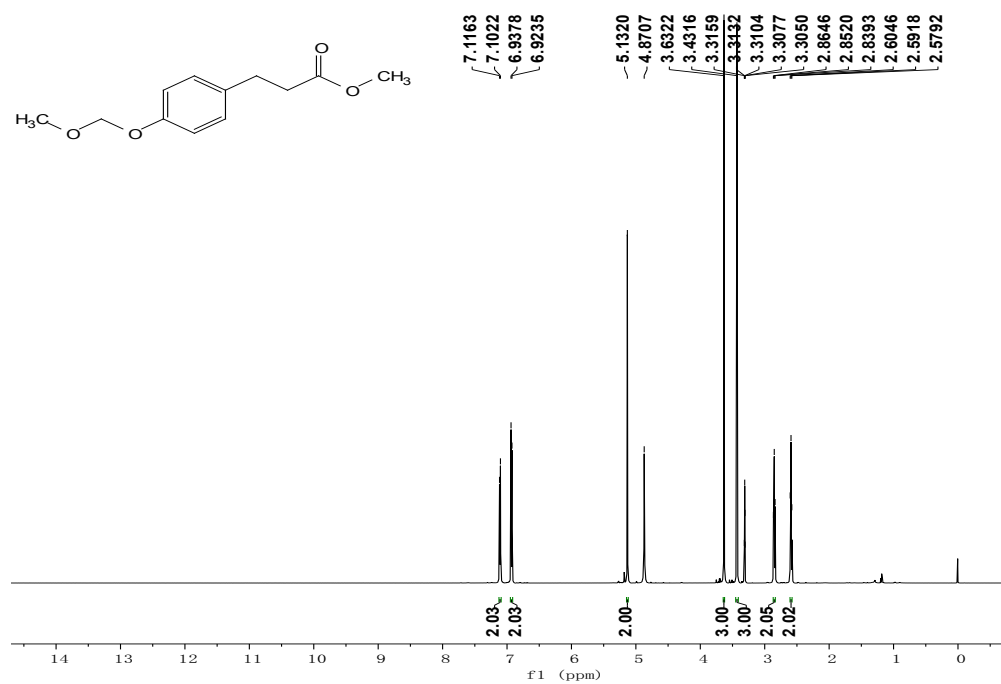

**Figure S1** 4-(methoxymethoxy)-benzene propanoic acid methyl ester

<sup>1</sup>H NMR (600 MHz, CD<sub>3</sub>OD) δ 7.11 (d, *J* = 8.5 Hz, 2H), 6.93 (d, *J* = 8.6 Hz, 2H), 5.13 (s, 2H), 3.63 (s, 3H), 3.43 (s, 3H), 2.85 (t, *J* = 7.6 Hz, 2H), 2.59 (t, *J* = 7.6 Hz, 2H).

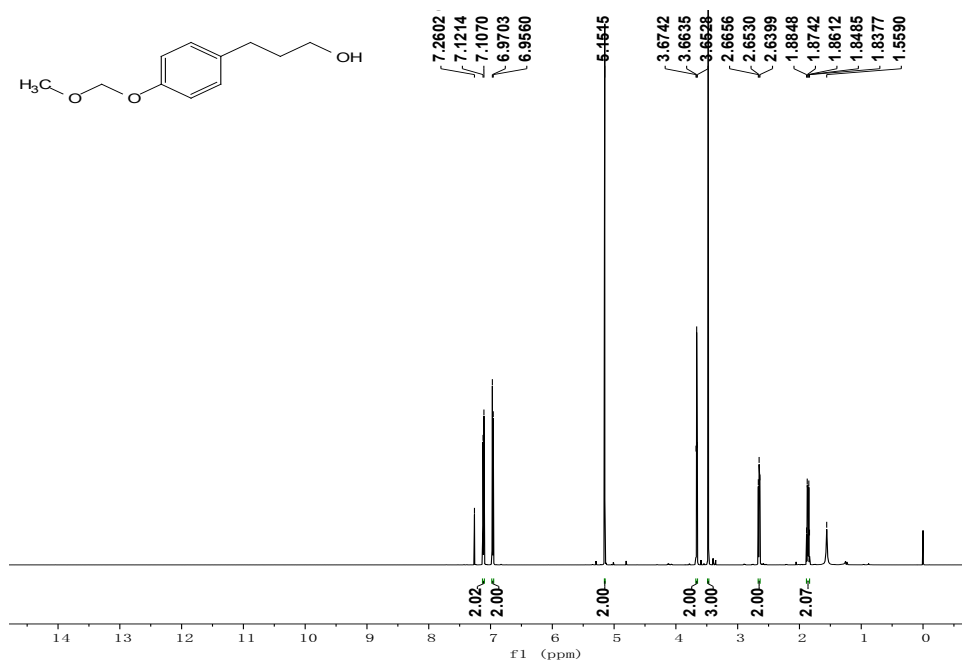

**Figure S2** 4-(methoxymethoxy)-benzene propanol

<sup>1</sup>H NMR (600 MHz, CDCl<sub>3</sub>) δ 7.11 (d, *J* = 8.6 Hz, 2H), 6.96 (d, *J* = 8.6 Hz, 2H), 5.15 (s, 2H), 3.66 (t, *J* = 6.4 Hz, 2H), 3.48 (s, 3H), 2.67 – 2.63 (m, 2H), 1.89 - 1.83 (m, 2H).

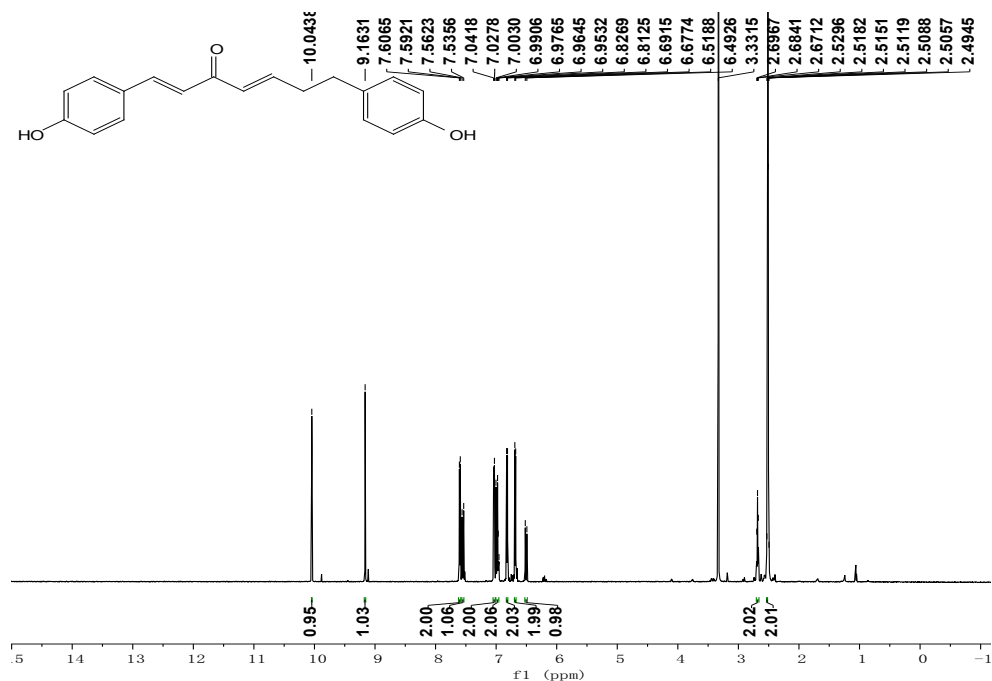

**Figure S3**  $^1\text{H}$ -NMR spectra of (1E,4E)-1,7-bis(4-hydroxyphenyl) hepta-1,4-dien-3-one

$^1\text{H}$  NMR (600 MHz,  $d_6$ -DMSO)  $\delta$  10.04 (s, 1H), 9.16 (s, 1H), 7.60 (d,  $J = 8.6$  Hz, 2H), 7.55 (d,  $J = 16.0$  Hz, 1H), 7.03 (d,  $J = 8.4$  Hz, 2H), 7.00-6.95 (m, 2H), 6.82 (d,  $J = 8.6$  Hz, 2H), 6.68 (d,  $J = 8.4$  Hz, 2H), 6.51 (d,  $J = 15.7$  Hz, 1H), 2.68 (t,  $J = 7.7$  Hz, 2H), 2.53-2.49 (m, 2H).

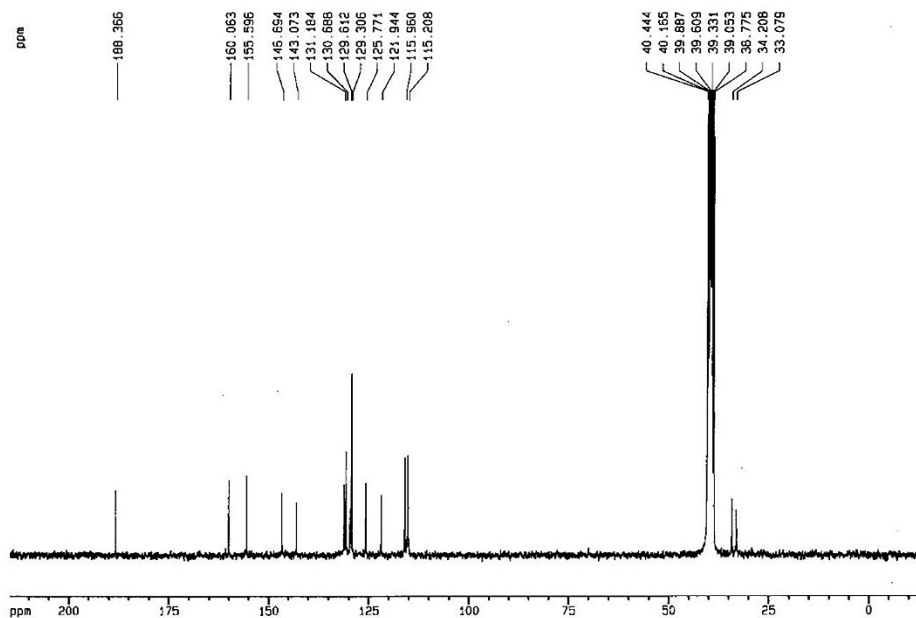

**Figure S4**  $^{13}\text{C}$ -NMR spectra of (1E,4E)-1,7-bis(4-hydroxyphenyl) hepta-1,4-dien-3-one

$^{13}\text{C}$  NMR (150 MHz,  $d_6$ -DMSO)  $\delta$  188.4, 160.1, 155.6, 146.7, 143.1, 131.2, 130.7, 130.7, 129.6, 129.3, 129.3, 125.8, 121.9, 116.0, 116.0, 115.2, 115.2, 34.2, 33.1.

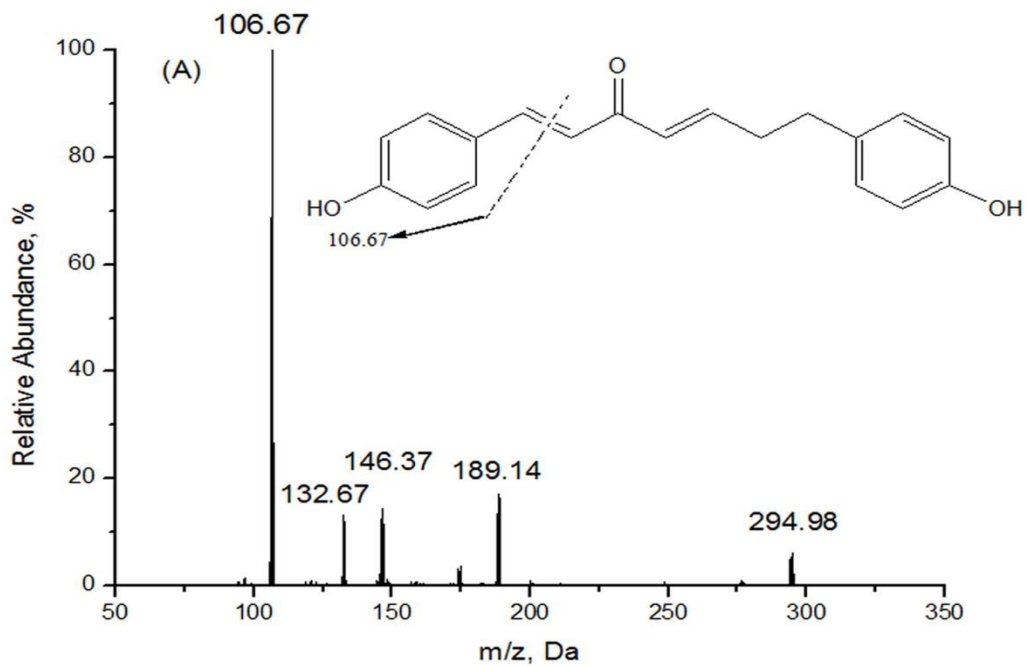

**Figure S5** MS spectra of (1E,4E)-1,7-bis(4-hydroxyphenyl) hepta-1,4-dien-3-one

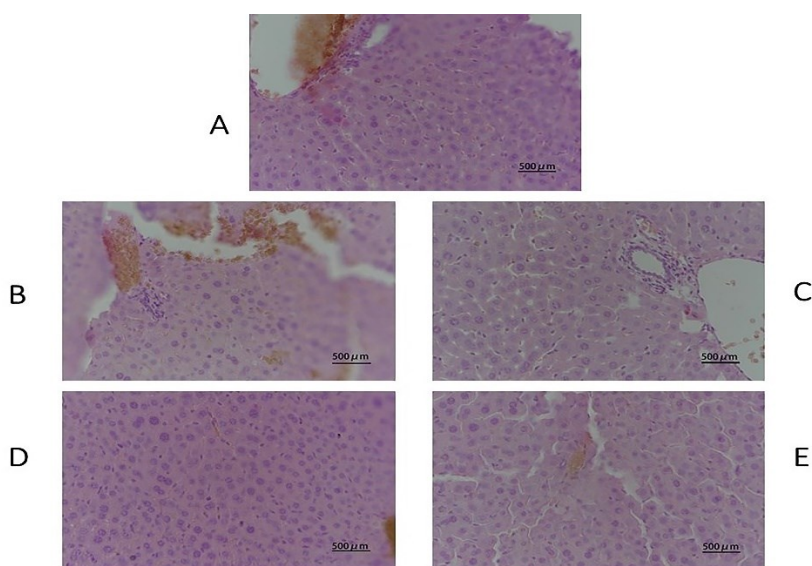

**Figure S6** Liver histopathology of various group obtained after the mice were sacrificed(A: Negative control group, B: Low dose group, C: Medium dose group, D: High dose group, E: Positive control group)

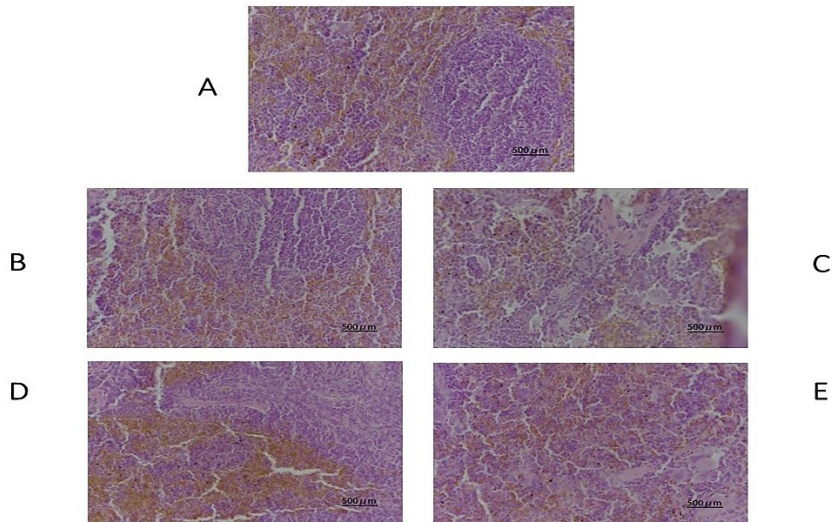

**Figure S7** Spleen histopathology of various group obtained after the mice were sacrificed(A: Negative control group, B: Low dose group, C: Medium dose group, D: High dose group, E: Positive control group)

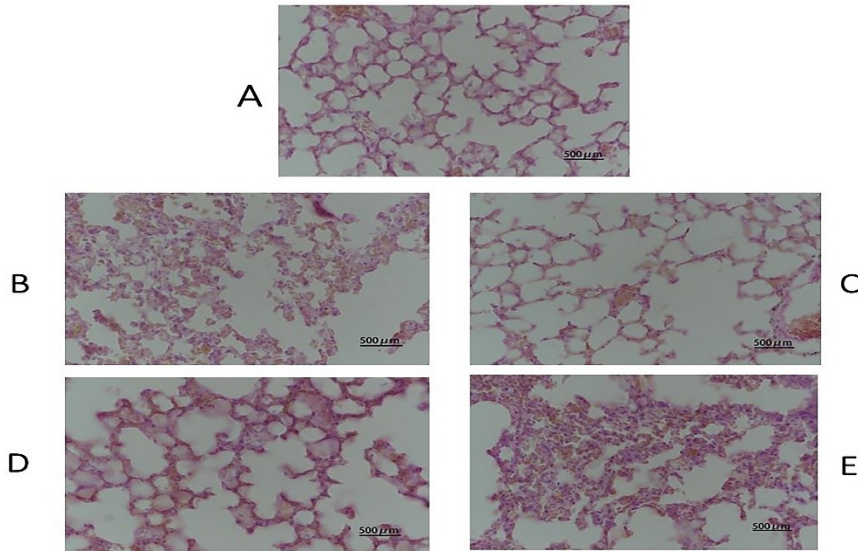

**Figure S8** Lung histopathology of various group obtained after the mice were sacrificed(A: Negative control group, B: Low dose group, C: Medium dose group, D: High dose group, E: Positive control group)

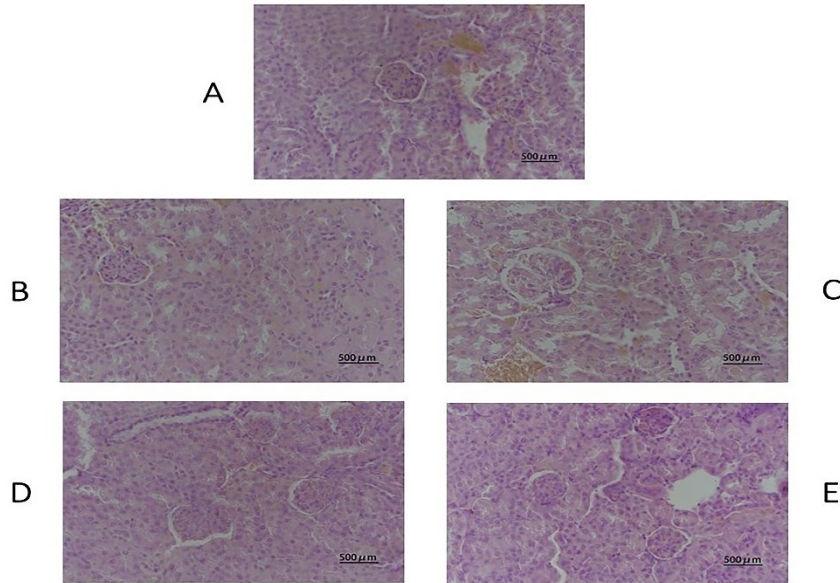

**Figure S9** Kidney histopathology of various group obtained after the mice were sacrificed(A: Negative control group, B: Low dose group, C: Medium dose group, D: High dose group, E: Positive control group)

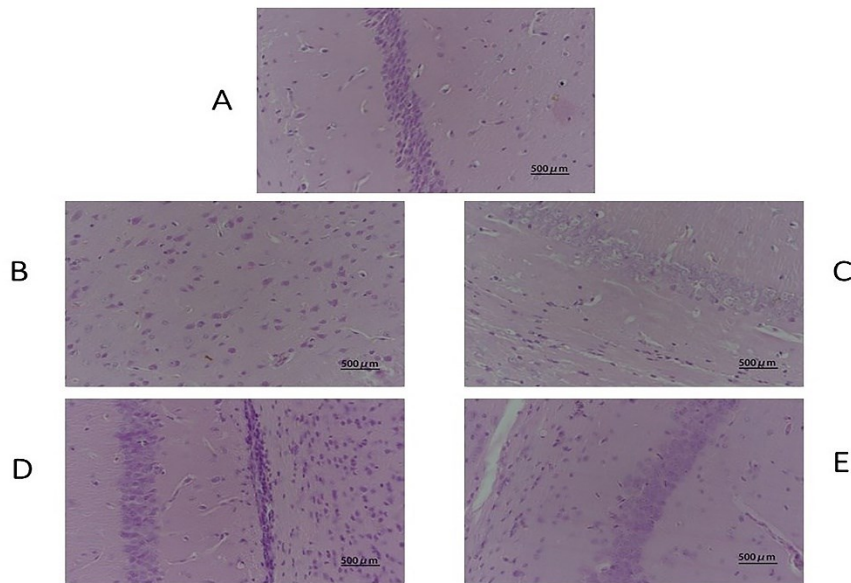

**Figure S10** Brain histopathology of various group obtained after the mice were sacrificed(A: Negative control group, B: Low dose group, C: Medium dose group, D: High dose group, E: Positive control group)

**Table S1.** Mean Tumor volume of various group at indicated time points after tail vein injection of DHDK solution

| Time (d) | Tumor volume (Mean $\pm$ SD , mm <sup>3</sup> ) |                     |                     |                     |                        |
|----------|-------------------------------------------------|---------------------|---------------------|---------------------|------------------------|
|          | Negative control group                          | Low dose group      | Medium dose group   | High dose group     | Positive control group |
| 0        | 194.39 $\pm$ 55.23                              | 200.03 $\pm$ 83.6   | 211.35 $\pm$ 83.83  | 188.15 $\pm$ 49.52  | 210.98 $\pm$ 49.52     |
|          | 381.11 $\pm$ 100.86                             | 246.35 $\pm$ 71.87  | 260.22 $\pm$ 108.20 | 225.84 $\pm$ 74.56  | 276.40 $\pm$ 82.75     |
| 4        | 598.82 $\pm$ 218.37                             | 406.06 $\pm$ 91.74  | 389.01 $\pm$ 132.76 | 302.74 $\pm$ 85.43  | 598.82 $\pm$ 141.73    |
|          | 780.10 $\pm$ 218.98                             | 530.17 $\pm$ 91.74  | 487.17 $\pm$ 132.76 | 458.62 $\pm$ 85.43  | 401.86 $\pm$ 141.73    |
| 8        | 1046.27 $\pm$ 149.64                            | 772.06 $\pm$ 128.85 | 632.13 $\pm$ 158.48 | 562.46 $\pm$ 59.20  | 1046.27 $\pm$ 93.49    |
|          | 1256.25 $\pm$ 190.75                            | 753.66 $\pm$ 153.92 | 695.48 $\pm$ 149.87 | 450.20 $\pm$ 173.21 | 472.68 $\pm$ 121.94    |

SD: Standard deviation

**Table S2.** Mean mice weight of various group at indicated time points after tail vein injection of DHDK solution

| Time (d) | Weight (Mean $\pm$ SD , g) |                  |                   |                  |                        |
|----------|----------------------------|------------------|-------------------|------------------|------------------------|
|          | Negative control group     | Low dose group   | Medium dose group | High dose group  | Positive control group |
| 0        | 19.53 $\pm$ 0.38           | 19.45 $\pm$ 1.67 | 19.9 $\pm$ 0.76   | 20.05 $\pm$ 1.17 | 19.32 $\pm$ 0.70       |
| 2        | 19.28 $\pm$ 0.77           | 19.43 $\pm$ 1.46 | 20.55 $\pm$ 0.92  | 19.98 $\pm$ 1.12 | 18.8 $\pm$ 0.77        |
| 4        | 19.70 $\pm$ 0.66           | 19.53 $\pm$ 1.36 | 20.45 $\pm$ 1.10  | 19.61 $\pm$ 0.98 | 17.06 $\pm$ 0.60       |
| 6        | 20.03 $\pm$ 0.76           | 19.60 $\pm$ 1.55 | 20.5 $\pm$ 1.04   | 19.87 $\pm$ 1.19 | 15.1 $\pm$ 0.74        |
| 8        | 20.48 $\pm$ 0.79           | 19.62 $\pm$ 1.46 | 20.38 $\pm$ 0.93  | 19.75 $\pm$ 0.92 | 14.52 $\pm$ 1.25       |
| 9        | 20.43 $\pm$ 0.77           | 20.48 $\pm$ 1.50 | 20.65 $\pm$ 1.07  | 20.03 $\pm$ 1.00 | 14.18 $\pm$ 1.19       |

SD: Standard deviation

**Table S3.** Plasma concentration of DHDK (ng·mL<sup>-1</sup>) after tail vein injection of 14 mg·kg<sup>-1</sup> DHDK solution (n=6)



| Time(h) | Mean   | SD    |
|---------|--------|-------|
| 0.033   | 1710.4 | 72.76 |
| 0.167   | 482.08 | 7.83  |
| 0.25    | 165.3  | 4.47  |
| 0.5     | 78.7   | 2.96  |
| 0.75    | 72.19  | 3.50  |
| 1       | 42.49  | 8.84  |
| 2       | 22.36  | 2.89  |
| 4       | 11.12  | 1.05  |
| 8       | 9.73   | 0.57  |
| 12      | 5.43   | 0.83  |

SD: Standard deviation

**Table S4.** Concentrations of DHDK ( $\text{ng}\cdot\text{mL}^{-1}$ ) in rat tissues after tail vein injection of  $14\text{ mg}\cdot\text{kg}^{-1}$  DHDK solution ( $n=6$ )

| Tissues | Concentration ( Mean $\pm$ SD, $\text{ng}\cdot\text{g}^{-1}$ ) |                       |                       |                       |                       |                       |
|---------|----------------------------------------------------------------|-----------------------|-----------------------|-----------------------|-----------------------|-----------------------|
|         | 0.083 h                                                        | 0.5 h                 | 2 h                   | 4 h                   | 8 h                   | 12 h                  |
| Heart   | 171.59 $\pm$<br>50.32                                          | 7.05 $\pm$<br>4.66    | 4.73 $\pm$<br>3.03    | 5.38 $\pm$<br>2.05    | 4.29 $\pm$<br>3.12    | 3.94 $\pm$<br>2.99    |
| Liver   | 581.40 $\pm$<br>75.23                                          | 180.19 $\pm$<br>30.57 | 151.84 $\pm$<br>20.52 | 144.21 $\pm$<br>30.66 | 132.39 $\pm$<br>27.98 | 132.83 $\pm$<br>22.37 |
| Spleen  | 18.47 $\pm$<br>7.69                                            | 45.55 $\pm$<br>23.79  | 31.59 $\pm$<br>14.13  | 31.20 $\pm$<br>14.23  | 31.21 $\pm$<br>10.12  | 30.45 $\pm$<br>10.66  |
| Lung    | 1744.21 $\pm$<br>90.611                                        | 540.57 $\pm$<br>79.06 | 455.53 $\pm$<br>78.77 | 432.64 $\pm$<br>34.98 | 397.16 $\pm$<br>21.90 | 398.48 $\pm$<br>34.84 |
| Kidney  | 55.41 $\pm$<br>10.09                                           | 136.65 $\pm$<br>31.23 | 94.78 $\pm$<br>10.26  | 93.61 $\pm$<br>20.13  | 93.62 $\pm$<br>14.09  | 91.34 $\pm$<br>24.98  |

SD: Standard deviation
